# Supplementary material
Source: PubMed Central journal article supplement (PMC3037632)
Supplement: supp_M110.161927_jbc.M110.161927-1.pdf [file supp_M110.161927_jbc.M110.161927-1.pdf]

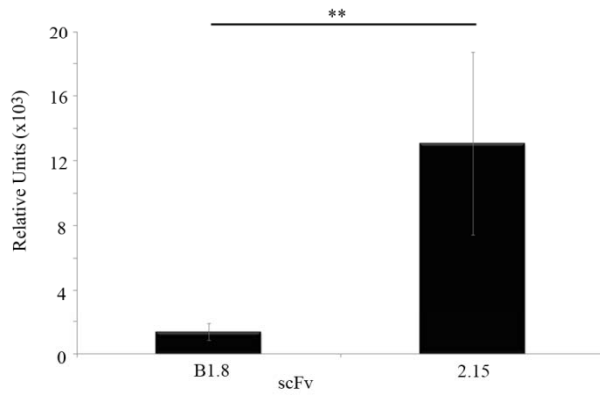

**Supplementary Figure 1. Comparison of B1.8 scFv and 2.15 scFv in *in vivo* imaging.** A region of interest corresponding to the tumour was selected on each image, and the average intensity was calculated using the Hokawo software. Mean  $\pm$  SEM (2.15, n=4; B1.8, n=4). One tail student's test (p=0.0087).

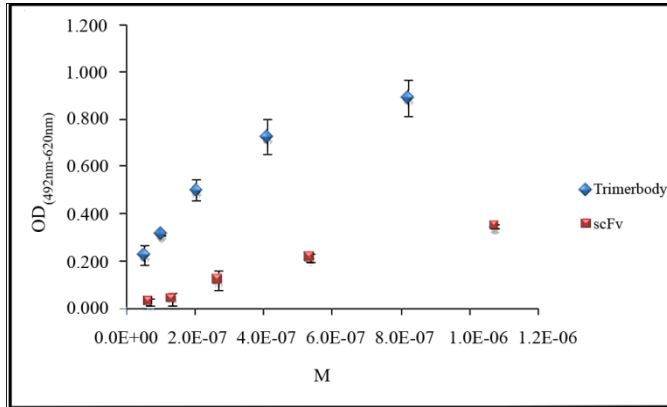

**Supplementary Figure 2. Comparison of 2.15 as scFv or trimerbody in ELISA.** A constant coating of p32 (5 $\mu$ g/ml), and a curve of different dilutions shows an enhanced binding in the trimerbody format as compared to the scFv. The concentration refers to the molar concentration of the monomers (although all the single-chain monomers would exist only as part of a trimer at the concentrations used).
